# Supplementary material for: Cost of breast cancer diagnosis and treatment in India: a scoping review protocol
Source: HighWire-hosted journal article supplement (doi:10.1136/bmjopen-2021-057008), 2022-03-01
Supplement: bmjopen-2021-057008supp002_data_supplement.pdf [file bmjopen-2021-057008supp002_data_supplement.pdf]

## Supplementary file 2: Draft Search Strategy for PubMed/MEDLINE

| PubMed/MEDLINE                                                                                                                                                                                                                                                                                                                                                                                                                                                                                                                                                                                                                                                                                                                                                                                                                                                                                                                                                                                                                                                                                                                                                                                                                                                                                                                                                                                                                                                                                                                                                                                                                                                                                                                                                                                                                                                                                                                                                                                                                                                                                                                                                                                                                                                                                                                                                                                                                                                                                                                                                                                                                                                                                                                                                                                                                                                                                                                                                                                                                                                                                                                                                                                                                                                                                                                                                                                                                                                                                                                                                                                                                                                                                                                                                                                                                                                                                                                                                                                                                                                                                                                                                                                                                                                                                                                                                                                                                                                                                         |
|--------------------------------------------------------------------------------------------------------------------------------------------------------------------------------------------------------------------------------------------------------------------------------------------------------------------------------------------------------------------------------------------------------------------------------------------------------------------------------------------------------------------------------------------------------------------------------------------------------------------------------------------------------------------------------------------------------------------------------------------------------------------------------------------------------------------------------------------------------------------------------------------------------------------------------------------------------------------------------------------------------------------------------------------------------------------------------------------------------------------------------------------------------------------------------------------------------------------------------------------------------------------------------------------------------------------------------------------------------------------------------------------------------------------------------------------------------------------------------------------------------------------------------------------------------------------------------------------------------------------------------------------------------------------------------------------------------------------------------------------------------------------------------------------------------------------------------------------------------------------------------------------------------------------------------------------------------------------------------------------------------------------------------------------------------------------------------------------------------------------------------------------------------------------------------------------------------------------------------------------------------------------------------------------------------------------------------------------------------------------------------------------------------------------------------------------------------------------------------------------------------------------------------------------------------------------------------------------------------------------------------------------------------------------------------------------------------------------------------------------------------------------------------------------------------------------------------------------------------------------------------------------------------------------------------------------------------------------------------------------------------------------------------------------------------------------------------------------------------------------------------------------------------------------------------------------------------------------------------------------------------------------------------------------------------------------------------------------------------------------------------------------------------------------------------------------------------------------------------------------------------------------------------------------------------------------------------------------------------------------------------------------------------------------------------------------------------------------------------------------------------------------------------------------------------------------------------------------------------------------------------------------------------------------------------------------------------------------------------------------------------------------------------------------------------------------------------------------------------------------------------------------------------------------------------------------------------------------------------------------------------------------------------------------------------------------------------------------------------------------------------------------------------------------------------------------------------------------------------------------------------|
| <p>((("breast neoplasms"[MeSH Terms] OR ("breast"[All Fields] AND "neoplasms"[All Fields]) OR "breast neoplasms"[All Fields] OR ("breast"[All Fields] AND "cancer"[All Fields]) OR "breast cancer"[All Fields] OR ("brca 1 protein"[All Fields] OR "brca 2 protein"[All Fields] OR "cancer of the breast"[All Fields] OR "breast cancer cell"[All Fields] OR "ductal carcinoma"[All Fields] OR "brca2 protein"[All Fields] OR "brca1 protein"[All Fields] OR "Breast Tumor"[All Fields] OR "Breast Malignant Tumors"[All Fields] OR "Malignant Neoplasm"[All Fields] OR "Breast Malignant Neoplasm"[All Fields] OR "Breast Carcinoma"[All Fields] OR "Triple Negative Breast Cancer"[All Fields] OR "Triple Negative Breast Neoplasms"[All Fields] OR "Triple Negative Breast Neoplasm"[All Fields] OR "Inflammatory Breast Neoplasms"[All Fields] OR "Inflammatory Breast Cancer"[All Fields] OR "Mucin-like Carcinoma-associated Antigen"[All Fields] OR "Unilateral Breast Cancer"[All Fields] OR "Hereditary Breast Cancer"[All Fields] OR "Mammary Cancer"[All Fields] OR "Mammary Cancers"[All Fields] OR "Human Mammary Carcinomas"[All Fields] OR "Human Mammary Cancer"[All Fields] OR "Breast Carcinoma In Situ"[All Fields])) AND ("healthcare cost*" [Text Word] OR "cancer treatment cost" [Title/Abstract] OR "cost*" [All Fields] OR "treatment cost*" [All Fields] OR "health care cost*" [All Fields] OR "diagnostic cost*" [All Fields] OR "indirect cost*" [All Fields] OR "direct cost*" [All Fields] OR "disease burden" [All Fields] OR "cost effectiveness analysis" [All Fields] OR "cost effectiveness benefit" [All Fields] OR "cost utility analysis" [All Fields] OR "cost estimation*" [All Fields] OR "pharmacoeconomic*" [Text Word] OR "cost of illness" [All Fields] OR "cost of disease" [All Fields] OR "disease cost*" [All Fields] OR "hospital cost*" [All Fields] OR "health economics" [All Fields] OR "economic evaluation" [Title/Abstract] OR "economic burden" [All Fields] OR "economic impact" [Text Word] OR "oop" [All Fields] OR "out of pocket" [All Fields] OR "out of pocket expenditure*" [All Fields] OR "out of pocket payment*" [All Fields] OR "medical cost*" [All Fields] OR "medical care cost*" [All Fields] OR ("developing countr*" [All Fields] OR "lmic*" [All Fields] OR "low income econom*" [All Fields] OR "developing econom*" [All Fields] OR "developing nation*" [All Fields] OR "developing population*" [All Fields] OR "less developed countr*" [All Fields] OR "Less-Developed Countries" [All Fields] OR "third world countr*" [All Fields] OR "third world nation*" [All Fields] OR "less developed nation*" [All Fields] OR "less developed econom*" [All Fields] OR "low to middle income countr*" [All Fields] OR "low middle income countr*" [All Fields] OR "low income countr*" [All Fields] OR "low income econom*" [All Fields] OR "lower income countr*" [All Fields] OR "lower income nation*" [All Fields] OR "lower income econom*" [All Fields] OR "lower income population*" [All Fields] OR "middle income countr*" [All Fields] OR "middle income econom*" [All Fields] OR "middle income nation*" [All Fields] OR "middle income group*" [All Fields] OR "transitional countr*" [All Fields] OR "transitional econom*" [All Fields] OR "under developed count*" [All Fields] OR "under developed nation*" [All Fields])) AND ("india*" [All Fields] OR "asia*" [All Fields] OR "south asia*" [All Fields] OR "bharat" [All Fields] OR "hindustan" [All Fields] OR "kerala*" [All Fields] OR "tamil nadu" [All Fields] OR "karnataka" [All Fields] OR "andra pradesh" [All Fields] OR "telangana" [All Fields] OR "goa" [All Fields] OR "Maharashtra" [All Fields] OR "Gujarat" [All Fields] OR "punjab" [All Fields] OR "Rajasthan" [All Fields] OR "Haryana" [All Fields] OR "Uttarakhand" [All Fields] OR "Jammu and Kashmir" [All Fields] OR "Uttar Pradesh" [All Fields] OR "Madhya Pradesh" [All Fields] OR "orissa" [All Fields] OR "bihar" [All Fields] OR "Jharkhand" [All Fields] OR "Chhattisgarh" [All Fields] OR "manipur" [All Fields] OR "West Bengal" [All Fields] OR "Sikkim" [All Fields] OR "Meghalaya" [All Fields] OR "assam" [All Fields] OR "Mizoram" [All Fields] OR "Tripura" [All Fields] OR "Arunachal Pradesh" [All Fields] OR "Himachal Pradesh" [All Fields] OR "Republic of India" [All Fields])) AND ((humans[Filter]) AND (english[Filter]) AND (2000:2021[pdat]))</p> |
