# Supplementary material for: Cost of breast cancer diagnosis and treatment in India: a scoping review protocol
Source: HighWire-hosted journal article supplement (doi:10.1136/bmjopen-2021-057008), 2022-03-01
Supplement: bmjopen-2021-057008supp003_data_supplement.pdf [file bmjopen-2021-057008supp003_data_supplement.pdf]

**Supplementary file 3. Data extraction form**

|                                                         |  |
|---------------------------------------------------------|--|
| <b>Citation Information</b>                             |  |
| Title of the Study                                      |  |
| Author(s)                                               |  |
| Date of publication                                     |  |
| Type and source of publication                          |  |
| Author Affiliation                                      |  |
| Contact Information                                     |  |
| <b>Study Characteristics</b>                            |  |
| Study title                                             |  |
| Aim/Objective of the Study                              |  |
| Study Period                                            |  |
| Study design                                            |  |
| Setting/ Location (State where the study was conducted) |  |
| Type of cancer assessed                                 |  |
| Stage of cancer                                         |  |
| Type of costs reported                                  |  |
| Follow-up costs reported                                |  |
| Currency of costs reported                              |  |

|                         |  |
|-------------------------|--|
| Other measures reported |  |
| Data collection period  |  |
| Target Population       |  |
| Sample Size             |  |
| Sampling method         |  |
| Data Sources            |  |
| Key findings            |  |
| Conclusion              |  |
| Comments                |  |
